# Supplementary material
Source: PubMed Central journal article supplement (PMC8978648)
Supplement: ehp10174.s001.acco.pdf [file ehp10174.s001.acco.pdf]

**Note to readers with disabilities:** *EHP* strives to ensure that all journal content is accessible to all readers. However, some figures and Supplemental Material published in *EHP* articles may not conform to [508 standards](#) due to the complexity of the information being presented. If you need assistance accessing journal content, please contact [ehp508@niehs.nih.gov](mailto:ehp508@niehs.nih.gov). Our staff will work with you to assess and meet your accessibility needs within 3 working days.

### **Supplemental Material**

#### **Association of Glyphosate Exposure with Blood DNA Methylation in a Cross-Sectional Study of Postmenopausal Women**

Rachel M. Lucia, Wei-Lin Huang, Khyatiben V. Pathak, Marissa McGilvrey, Victoria David-Dirgo, Andrea Alvarez, Deborah Goodman, Irene Masunaka, Andrew O. Odegaard, Argyrios Ziogas, Patrick Pirrotte, Trina M. Norden-Krichmar, and Hannah Lui Park

#### **Table of Contents**

**Table S1.** Linearity, limits, and precision of glyphosate and aminomethylphosphonic acid (AMPA) measurement by liquid chromatography with tandem mass spectrometry (LC-MS/MS) in urine.

**Table S2.** Distribution of estimated cell type proportions from the Houseman method, presented as mean (SD), by tertile of urinary glyphosate and AMPA in 392 postmenopausal California women.

**Table S3.** Cohort characteristics stratified by randomized set assignment (training or validation).

**Table S4.** Final coefficients for the glyphosate methylation index.

**Figure S1.** Calibration curve for a) glyphosate and b) AMPA ranging from 0 to 5 ng/mL in urine. The area ratio represents the ratio of variable concentration of glyphosate and AMPA (0 to 5ng/mL) to their respective internal standards ( $^{13}\text{C}_2^{15}\text{N}$ -Glyphosate and  $\text{D}_2^{13}\text{C}^{15}\text{N}$ -AMPA) with a constant concentration of 6.25 ng/mL spiked in urine. AMPA: aminomethylphosphonic acid.

**Figure S2.** Histograms of urinary glyphosate (A) and AMPA (B) concentration measured by liquid chromatography with tandem mass spectrometry (LC-MS/MS) in 392 postmenopausal California women, averaged for two samples from each individual, and histograms of the natural log of urinary glyphosate (C) and AMPA (D). LOD: 0.014 ng/mL for glyphosate and 0.013 ng/mL for AMPA. AMPA: aminomethylphosphonic acid.

**Figure S3.** Scatter plots of between-sample glyphosate (A) and AMPA (B) concentrations measured by LC-MS/MS in postmenopausal California women (n = 388 individuals with paired urine samples). Panel C shows the relationship between glyphosate and AMPA concentration within-samples (n = 780 samples from 392 individuals). All concentrations are transformed with the natural logarithm and divided by the urinary creatinine concentration to account for per-sample differences in urine concentration. AMPA: aminomethylphosphonic acid.

**Figure S4.** Correlation of epigenetic age from the Hannum (A), Horvath (B), and Levine (C) epigenetic clocks, epigenetic age acceleration from each clock (E-G), and DunedinPoAm (H) compared to chronologic age in 392 postmenopausal California women. Also shown is a histogram of standardized (z-score) DunedinPoAm (D). Epigenetic age acceleration was calculated by forming residuals from a model regressing chronologic age on epigenetic age from each clock. Dotted lines show where chronologic age equals epigenetic age (panels A-C) or where epigenetic age acceleration or epigenetic pace of aging (PoA) equals zero (panels D-H).

**Figure S5.** Performance of methylation index using 14 CpG sites on the 450K methylation array to predict urinary glyphosate concentration in the training set (A) and the validation set (B, C). Panel D shows the classification performance of the methylation index in the validation set for classifying the highest vs. the lowest tertile of urinary glyphosate. The index was developed using elastic net regression on methylation  $\beta$  values of differentially methylated probes associated with glyphosate and found on the Illumina 450K methylation array in the training set, a population of 332 postmenopausal California women.

**Figure S6.** Performance of methylation index using 2 CpG sites to predict urinary AMPA concentration in the training set (A) and the validation set (B, C). Panel D shows the classification performance of the methylation index in the validation set for classifying the highest vs. the lowest tertile of urinary AMPA. The index was developed using elastic net regression on methylation  $\beta$  values of differentially methylated probes associated with AMPA in the training set, a population of 332 postmenopausal California women. AMPA: aminomethylphosphonic acid.

Table S1. Linearity, limits, and precision of glyphosate and aminomethylphosphonic acid (AMPA) measurement by liquid chromatography with tandem mass spectrometry (LC-MS/MS) in urine.

| Analyte           | Coefficient of determination (R <sup>2</sup> ) | LOD (ng/mL) | LOQ (ng/mL) | Precision (%) |           |                  |                     |                  |
|-------------------|------------------------------------------------|-------------|-------------|---------------|-----------|------------------|---------------------|------------------|
|                   |                                                |             |             | At LOD        | At LOQ    | Quality control  |                     |                  |
|                   |                                                |             |             |               |           | Low (0.25 ng/mL) | Medium (0.75 ng/mL) | High (2.5 ng/mL) |
| <b>Glyphosate</b> | 0.9921                                         | 0.014       | 0.041       | 13.7 (19.6)   | 5.3 (7.4) | 12.2 (7.2)       | 6.9 (5.3)           | 2.9 (1.2)        |
| <b>AMPA</b>       | 0.9951                                         | 0.013       | 0.040       | 6.3 (4.5)     | 6.9 (9.7) | 9.4 (9.2)        | 6.8 (3.4)           | 4.4 (4.2)        |

Precision is shown as intraday (interday) precision.

Table S2. Distribution of estimated cell type proportions from the Houseman method, presented as mean (SD), by tertile of urinary glyphosate and AMPA in 392 postmenopausal California women.

|                   | Proportions, Mean (SD) |                      |                      |      | Proportions, Mean (SD) |                |                |      |
|-------------------|------------------------|----------------------|----------------------|------|------------------------|----------------|----------------|------|
|                   | Glyphosate Tertile 1   | Glyphosate Tertile 2 | Glyphosate Tertile 3 | p    | AMPA Tertile 1         | AMPA Tertile 2 | AMPA Tertile 3 | p    |
| <b>CD8T</b>       | 10.7% (4.2%)           | 10.7% (4.0%)         | 10.3% (3.8%)         | 0.62 | 10.4% (4.3%)           | 11.0% (4.0%)   | 10.3% (3.7%)   | 0.27 |
| <b>CD4T</b>       | 15.4% (6.0%)           | 14.7% (5.1%)         | 15.3% (5.6%)         | 0.65 | 15.3% (5.9%)           | 15.3% (5.7%)   | 14.7% (5.3%)   | 0.35 |
| <b>NK</b>         | 5.8% (2.4%)            | 5.4% (1.9%)          | 5.6% (2.4%)          | 0.56 | 5.6% (2.5%)            | 5.7% (2.0%)    | 5.5% (2.3%)    | 0.47 |
| <b>B Cell</b>     | 6.4% (2.5%)            | 6.4% (2.7%)          | 6.4% (2.2%)          | 0.73 | 6.5% (3.0%)            | 6.5% (2.1%)    | 6.2% (2.1%)    | 0.50 |
| <b>Monocyte</b>   | 8.9% (1.8%)            | 8.9% (2.2%)          | 9.1% (2.1%)          | 0.95 | 9.0% (1.8%)            | 8.8% (1.9%)    | 9.1% (2.3%)    | 0.18 |
| <b>Neutrophil</b> | 57.8% (9.6%)           | 58.7% (8.8%)         | 58.4% (8.6%)         | 0.69 | 58.1% (9.6%)           | 57.6% (8.3%)   | 59.2% (9.0%)   | 0.28 |

P-values are for each cell type in a linear regression model including all cell types. Results were consistent when glyphosate and AMPA were analyzed as continuous variables. AMPA: aminomethylphosphonic acid

Table S3. Cohort characteristics stratified by randomized set assignment (training or validation).

|                                  | Training           | Validation  |       |
|----------------------------------|--------------------|-------------|-------|
|                                  | N (%) or Mean (SD) |             | p     |
| <b>Race/Ethnicity</b>            |                    |             | 0.44  |
| Asian                            | 37 (11.3%)         | 6 (10.2%)   |       |
| Hispanic                         | 54 (16.5%)         | 15 (25.4%)  |       |
| Other                            | 18 (5.5%)          | 2 (3.4%)    |       |
| White                            | 218 (66.7%)        | 36 (61.0%)  |       |
| <b>Age (years)</b>               | 56.9 (4.6)         | 56.8 (4.3)  | 0.81  |
| <b>BMI (kg/m<sup>2</sup>)</b>    | 26.7 (6.2)         | 27.4 (8.1)  | 0.39  |
| <b>Smoking Status</b>            |                    |             | 0.029 |
| Never                            | 250 (75.3%)        | 35 (59.3%)  |       |
| Former                           | 68 (20.5%)         | 21 (35.6%)  |       |
| Current                          | 14 (4.2%)          | 3 (5.1%)    |       |
| <b>Alcohol (drinks/week)</b>     |                    |             | 0.99  |
| None                             | 92 (27.7%)         | 15 (25.4%)  |       |
| 1 or fewer                       | 136 (41.0%)        | 25 (42.4%)  |       |
| 2-6                              | 61 (18.4%)         | 11 (18.6%)  |       |
| 7 or more                        | 43 (13.0%)         | 8 (13.6%)   |       |
| <b>Organic Eating</b>            |                    |             | 0.23  |
| Seldom/Never                     | 109 (32.8%)        | 15 (25.4%)  |       |
| Sometimes                        | 99 (29.8%)         | 15 (25.4%)  |       |
| Often/Always                     | 124 (37.3%)        | 29 (49.2%)  |       |
| <b>HEI</b>                       | 63.7 (12.3)        | 62.5 (11.2) | 0.47  |
| <b>Physical Activity</b>         |                    |             | 0.88  |
| ≥150 minutes/week                | 129 (40.4%)        | 24 (42.1%)  |       |
| <150 minutes/week                | 190 (59.6%)        | 33 (57.9%)  |       |
| <b>Herbicide Use (past week)</b> |                    |             | 0.22  |
| Yes                              | 20 (9.7%)          | 1 (2.4%)    |       |
| No                               | 186 (90.3%)        | 41 (97.6%)  |       |
| <b>Glyphosate Tertile</b>        |                    |             | 1.0   |
| Tertile 1                        | 111 (33.4%)        | 20 (33.3%)  |       |
| Tertile 2                        | 110 (33.1%)        | 20 (33.3%)  |       |
| Tertile 3                        | 111 (33.4%)        | 20 (33.3%)  |       |
| <b>AMPA Tertile</b>              |                    |             | 0.79  |
| Tertile 1                        | 109 (32.8%)        | 22 (36.7%)  |       |
| Tertile 2                        | 110 (33.1%)        | 20 (33.3%)  |       |
| Tertile 3                        | 113 (34.0%)        | 18 (30.0%)  |       |

Randomization was stratified by glyphosate tertile. P-values are from ANOVA (continuous variables) or Fisher's exact test (categorical variables). BMI: body mass index; HEI: Healthy Eating Index; AMPA: aminomethylphosphonic acid

Table S4. Final coefficients for the glyphosate methylation index.

| Probe       | Coefficient<br>(Main Index) | Coefficient<br>(Probes on 450k<br>Array Only) |
|-------------|-----------------------------|-----------------------------------------------|
| (Intercept) | 37.592                      | 20.864                                        |
| cg26483235  | -11.943                     | -8.784                                        |
| cg04915788  | -6.849                      | -8.541                                        |
| cg01430385  | -7.175                      | -6.456                                        |
| cg26787244  | -7.146                      | -5.493                                        |
| cg00355690  | 0.806                       | -4.898                                        |
| cg20531550  | -2.470                      | -3.612                                        |
| cg02519806  | -6.608                      | -3.144                                        |
| cg13170005  | -2.549                      | -2.701                                        |
| cg13310154  | -1.069                      | -0.942                                        |
| cg18722557  | 2.785                       | 1.348                                         |
| cg05730283  | 7.747                       | 4.327                                         |
| cg11062848  | 6.206                       | 5.956                                         |
| cg20540608  | 5.693                       | 6.934                                         |
| cg25597976  | 6.881                       | 6.935                                         |
| cg06993862  | -9.407                      | N/A                                           |
| cg07261978  | -5.128                      | N/A                                           |
| cg07318309  | 1.379                       | N/A                                           |
| cg07509511  | -0.236                      | N/A                                           |
| cg13499896  | -4.945                      | N/A                                           |
| cg16601151  | -0.409                      | N/A                                           |
| cg19029576  | -1.952                      | N/A                                           |
| cg24576174  | -4.708                      | N/A                                           |
| cg25629796  | 2.915                       | N/A                                           |
| cg26833395  | -1.108                      | N/A                                           |

Probes exclusive to the EPIC array are marked N/A for the 450k index. To obtain the predicted glyphosate level (natural log) for a sample, multiply the  $\beta$  percentage values for each probe by the coefficient, add all values, and add the intercept. The index was developed using elastic net regression on methylation  $\beta$  values of differentially methylated probes associated with glyphosate in the training set, a population of 332 postmenopausal California women.

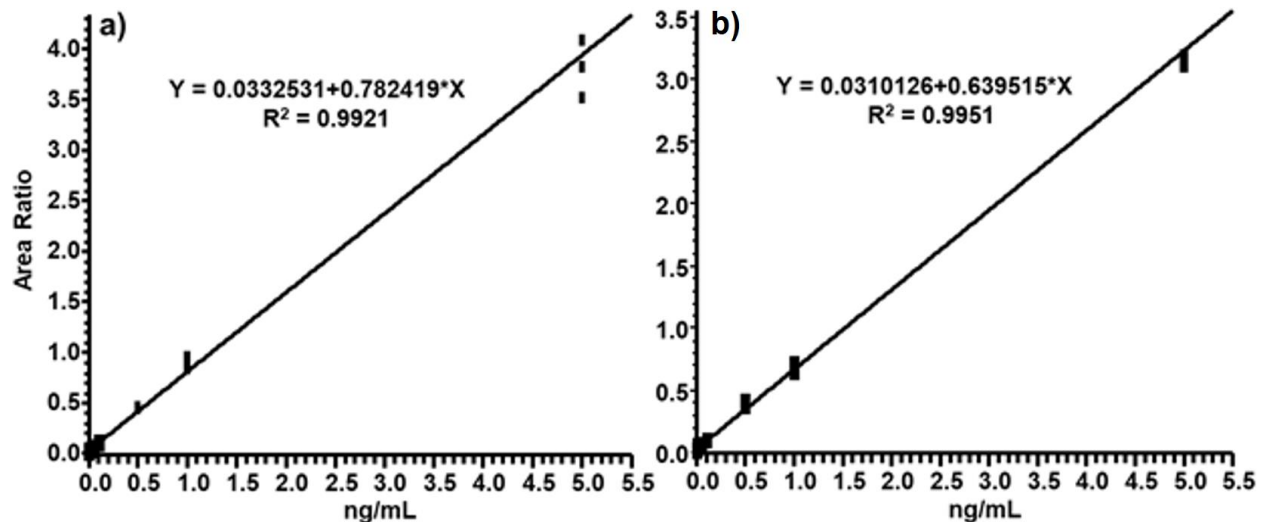

Figure S1. Calibration curve for a) glyphosate and b) AMPA ranging from 0 to 5 ng/mL in urine. The area ratio represents the ratio of variable concentration of glyphosate and AMPA (0 to 5ng/mL) to their respective internal standards ( $^{13}\text{C}_2^{15}\text{N}$ -Glyphosate and  $\text{D}_2^{13}\text{C}^{15}\text{N}$ -AMPA) with a constant concentration of 6.25 ng/mL spiked in urine. AMPA: aminomethylphosphonic acid

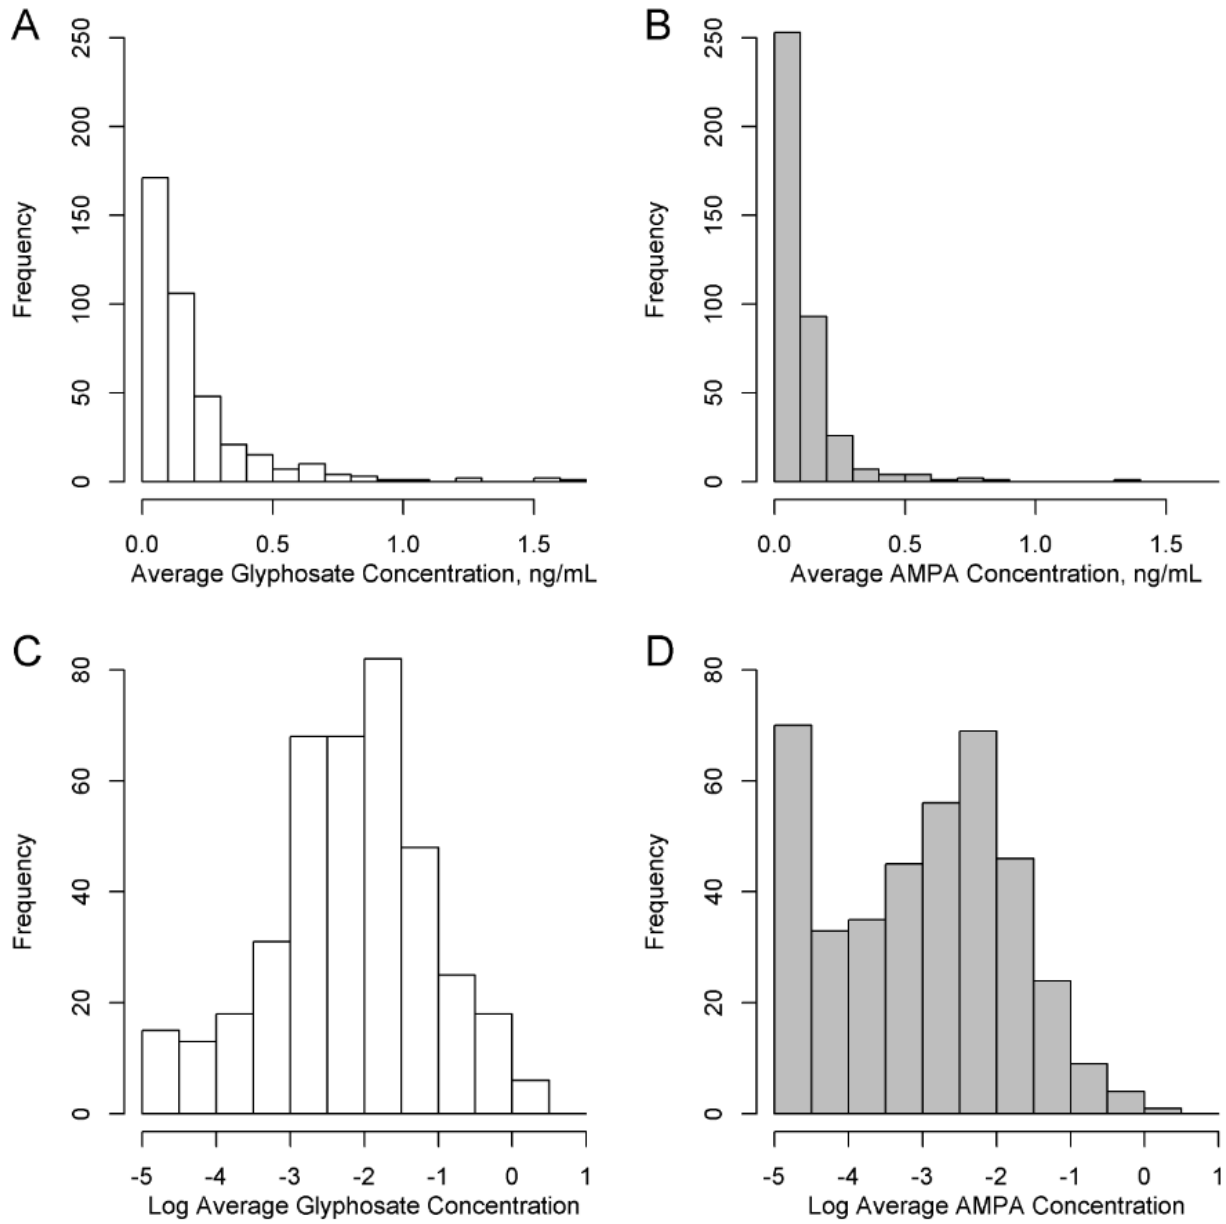

Figure S2: Histograms of urinary glyphosate (A) and AMPA (B) concentration measured by liquid chromatography with tandem mass spectrometry (LC-MS/MS) in 392 postmenopausal California women, averaged for two samples from each individual, and histograms of the natural log of urinary glyphosate (C) and AMPA (D). LOD: 0.014 ng/mL for glyphosate and 0.013 ng/mL for AMPA. AMPA: aminomethylphosphonic acid

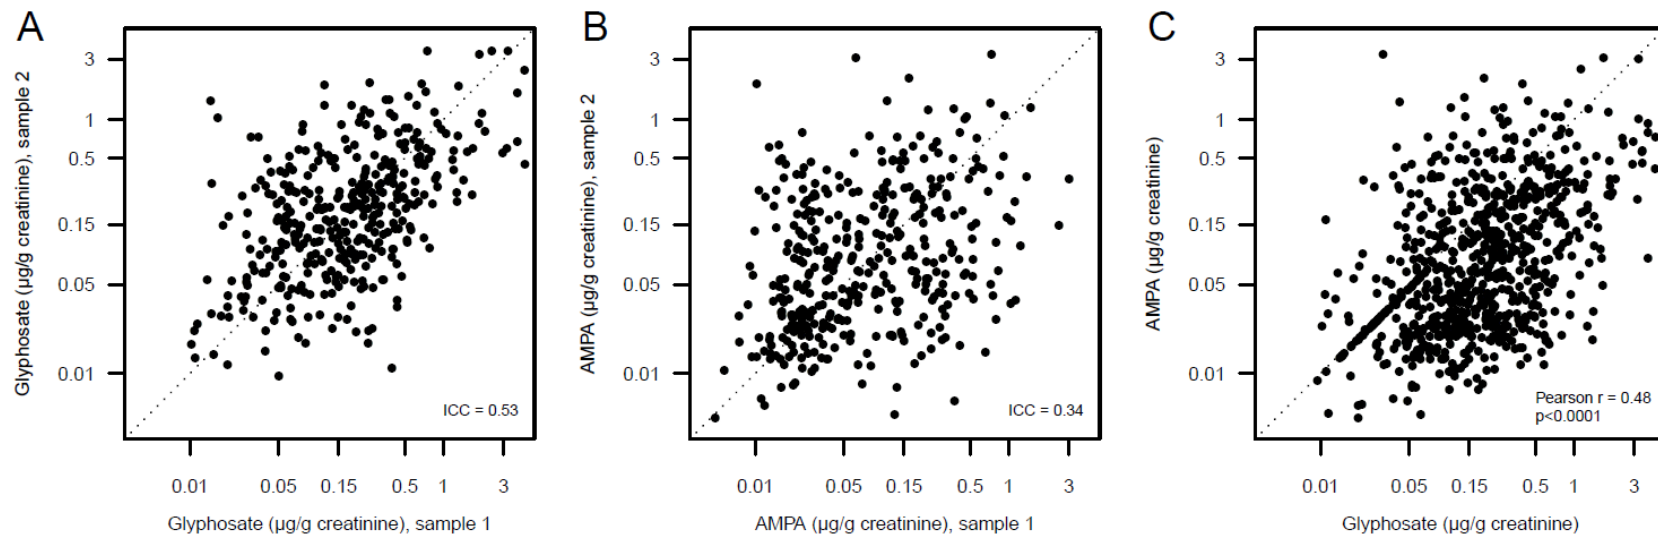

Figure S3. Scatter plots of between-sample glyphosate (A) and AMPA (B) concentrations measured by LC-MS/MS in postmenopausal California women ( $n = 388$  individuals with paired urine samples). Panel C shows the relationship between glyphosate and AMPA concentration within-samples ( $n = 780$  samples from 392 individuals). All concentrations are transformed with the natural logarithm and divided by the urinary creatinine concentration to account for per-sample differences in urine concentration. AMPA: aminomethylphosphonic acid



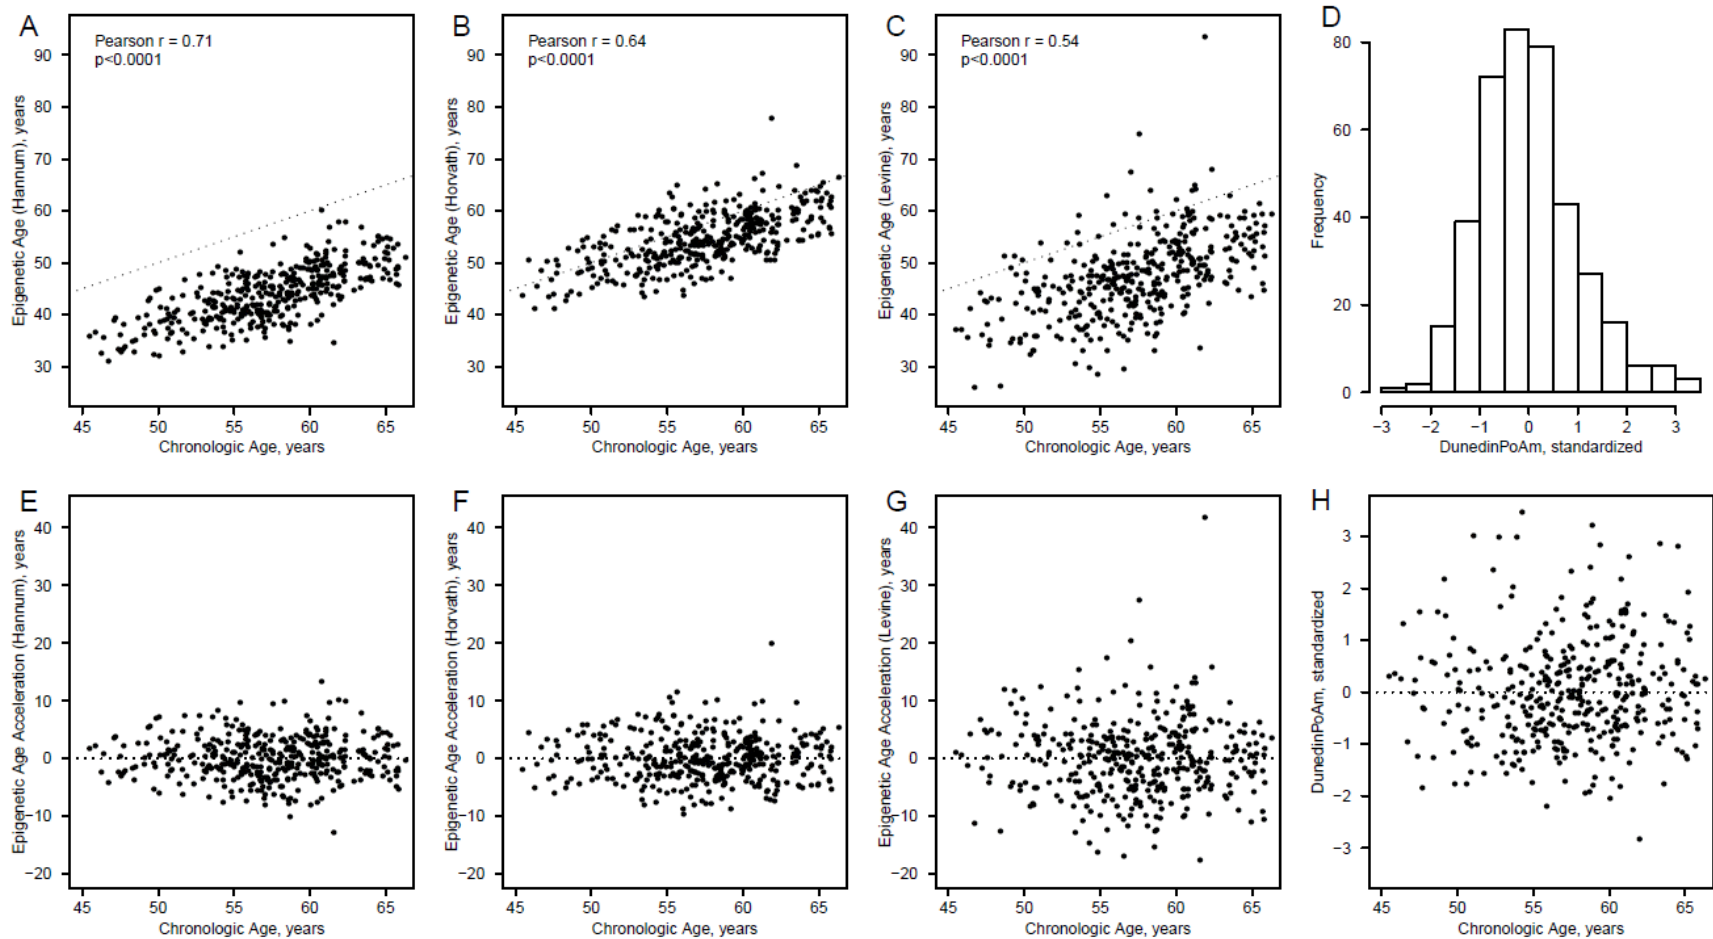

Figure S4. Correlation of epigenetic age from the Hannum (A), Horvath (B), and Levine (C) epigenetic clocks, epigenetic age acceleration from each clock (E-G), and DunedinPoAm (H) compared to chronologic age in 392 postmenopausal California women. Also shown is a histogram of standardized (z-score) DunedinPoAm (D). Epigenetic age acceleration was calculated by forming residuals from a model regressing chronologic age on epigenetic age from each clock. Dotted lines show where chronologic age equals epigenetic age (panels A-C) or where epigenetic age acceleration or epigenetic pace of aging (PoA) equals zero (panels D-H).

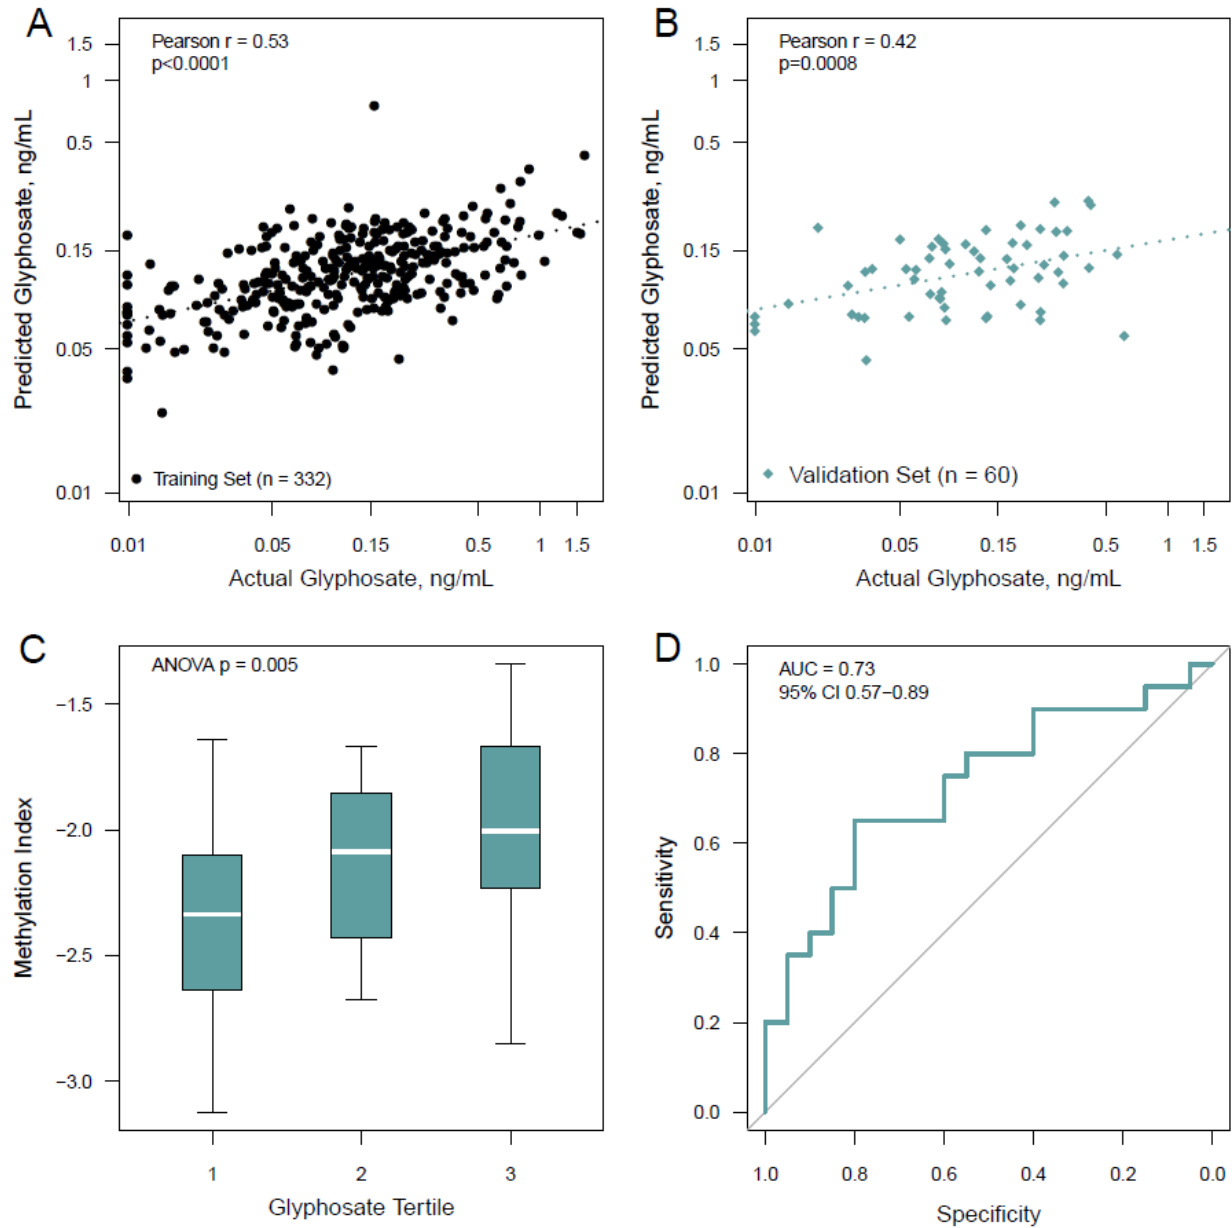

Figure S5. Performance of methylation index using 14 CpG sites on the 450K methylation array to predict urinary glyphosate concentration in the training set (A) and the validation set (B, C). Panel D shows the classification performance of the methylation index in the validation set for classifying the highest vs. the lowest tertile of urinary glyphosate. The index was developed using elastic net regression on methylation  $\beta$  values of differentially methylated probes associated with glyphosate and found on the Illumina 450K methylation array in the training set, a population of 332 postmenopausal California women.

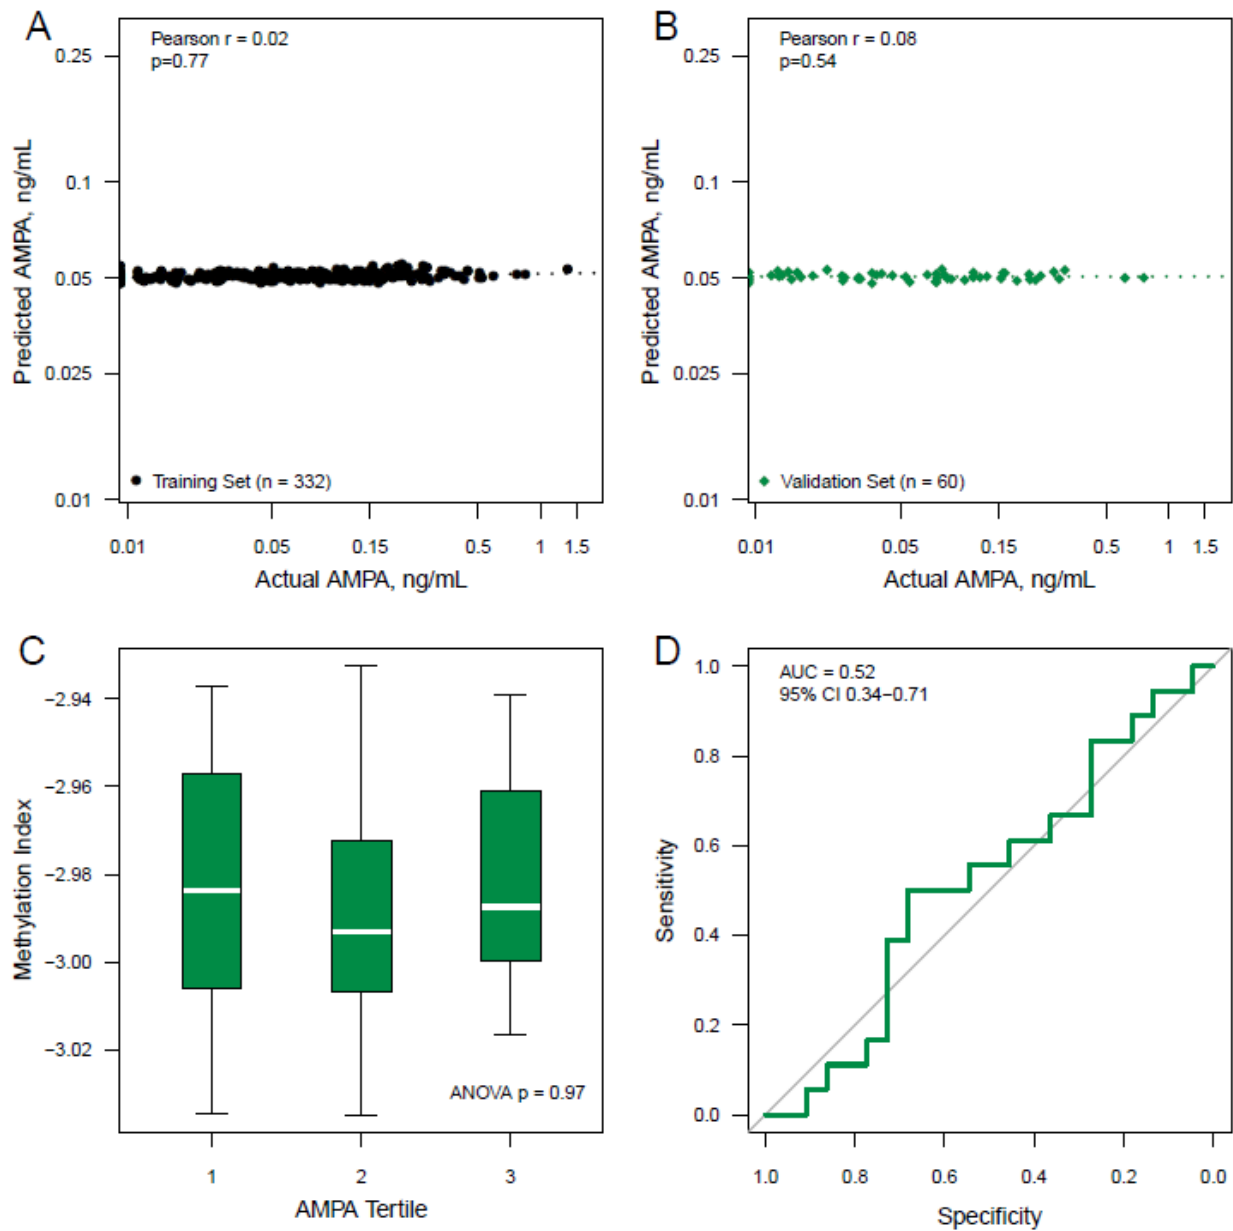

Figure S6. Performance of methylation index using 2 CpG sites to predict urinary AMPA concentration in the training set (A) and the validation set (B, C). Panel D shows the classification performance of the methylation index in the validation set for classifying the highest vs. the lowest tertile of urinary AMPA. The index was developed using elastic net regression on methylation  $\beta$  values of differentially methylated probes associated with AMPA in the training set, a population of 332 postmenopausal California women. AMPA: aminomethylphosphonic acid
